# Supplementary material
Source: Springer Nature journal article supplement (https://www.springermedizin.de/resource/supplementary/12995_2009_120_MOESM1_ESM.pdf/9622722)

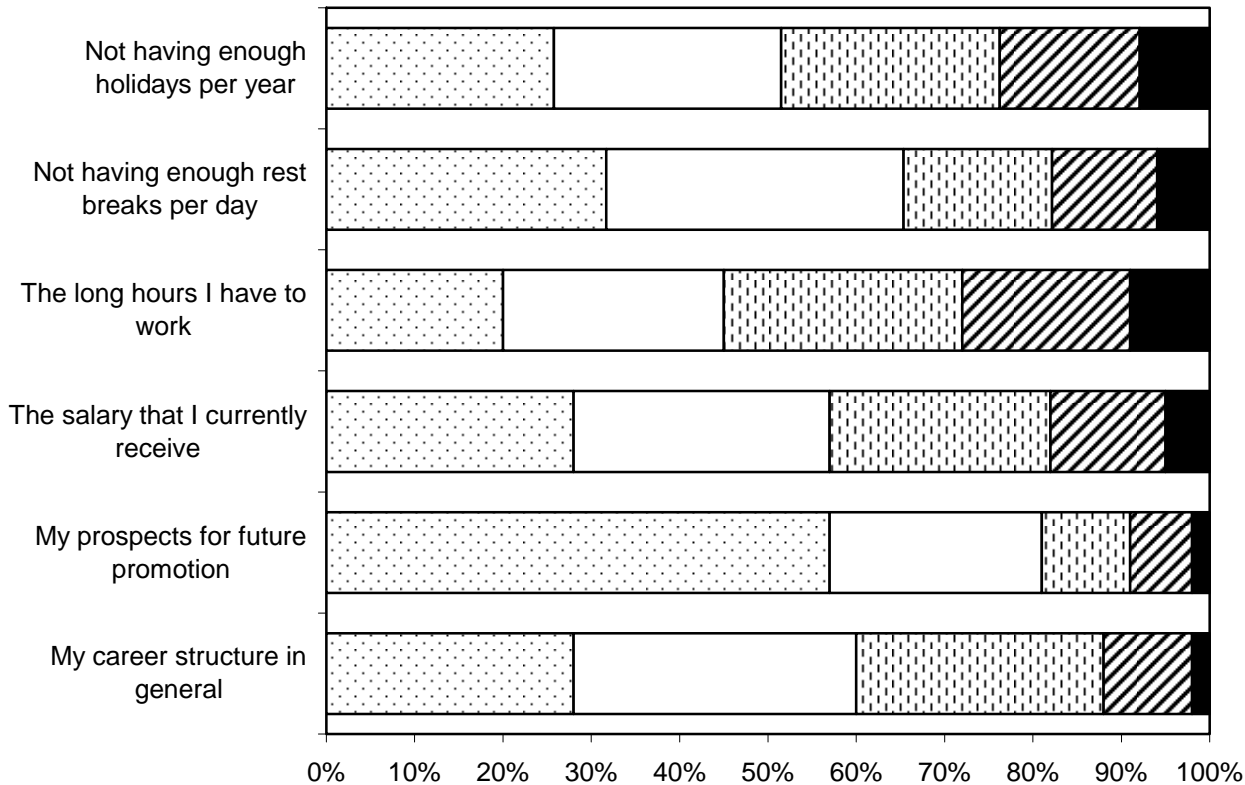

□ No stress

□ Mild stress

▨ Moderate stress

▩ Much stress

■ Extreme stress

Supplement: MOESM1 [file 9622722]
